1 **Short title:** Mechanism of miR2105-OsbZIP86 module in drought  
2 tolerance

3 **miR2105 regulates ABA biosynthesis via OsbZIP86-OsNCED3**  
4 **module to contribute to drought tolerance in rice**

5 Weiwei Gao<sup>1,2</sup>, Mingkang Li<sup>1,2</sup>, Songguang Yang<sup>3</sup>, Chunzhi Gao<sup>1</sup>, Yan Su<sup>1</sup>, Xuan  
6 Zeng<sup>1</sup>, Zhengli Jiao<sup>1</sup>, Weijuan Xu<sup>1,2</sup>, Mingyong Zhang<sup>1,2,4\*</sup> and Kuaifei Xia<sup>1,2,4\*</sup>

7  
8 <sup>1</sup>*Key Laboratory of South China Agricultural Plant Molecular Analysis and Genetic Improvement &*  
9 *Guangdong Provincial Key Laboratory of Applied Botany, South China Botanical Garden, Chinese*  
10 *Academy of Sciences, Guangzhou 510650, China*

11 <sup>2</sup>*University of Chinese Academy of Sciences, Beijing 10049, China*

12 <sup>3</sup>*Vegetable Research Institute, Guangdong Academy of Agricultural Sciences, Guangzhou 510640,*  
13 *China*

14 <sup>4</sup>*Center of Economic Botany, Core Botanical Gardens, Chinese Academy of Sciences, Guangzhou*  
15 *510650, China*

16

17 \*Correspondence author:

18 Mingyong Zhang (e-mail: [zhangmy@scbg.ac.cn](mailto:zhangmy@scbg.ac.cn)), South China Botanical Garden, Chinese Academy of  
19 Sciences, Guangzhou 510650, China.

20

21 The authors responsible for distribution of materials integral to the findings presented in this article in  
22 accordance with the policy described in the Instructions for Authors  
23 (<https://academic.oup.com/plphys/pages/General-Instructions>) are Mingyong Zhang  
24 ([zhangmy@scbg.ac.cn](mailto:zhangmy@scbg.ac.cn)) and Kuaifei Xia ([xiakuaifei@scbg.ac.cn](mailto:xiakuaifei@scbg.ac.cn)).

25

26 One-sentence summary: ‘miR2105-OsbZIP86-OsNCED3’ module plays crucial role in mediating ABA  
27 biosynthesis to contribute to drought tolerance with no penalty with respect to agronomic traits under  
28 normal conditions.

29 **Author contributions**

30 M. Zhang and K. Xia proposed the project. W. Gao, M. Li, S. Yang, Y. Su, C. Gao, Z. Jiao, W. Xu and

31 X. Zeng performed the experiments. W. Gao, M. Zhang and K. Xia drafted the manuscript. M. Zhang,

32 K. Xia and S. Yang revised the manuscript. All authors read and approved the final manuscript.

33

34 **Funding information**

35 This research was supported by National Natural Science Foundation of China (31971816, 31772384,

36 32171933); Strategic Priority Research Program of the Chinese Academy of Sciences

37 (XDA24030201-3).

38

39 **Abstract**

40 Induced abscisic acid (ABA) biosynthesis plays an important role in plant tolerance to abiotic stresses,  
41 including drought, cold and salinity. However, regulation pathway of the ABA biosynthesis in response  
42 to stresses is unclear. Here, we identified a rice miRNA, osa-miR2105 (miR2105), which plays a  
43 crucial role in ABA biosynthesis under drought stress. Analysis of expression, transgenic rice and  
44 cleavage site showed that *OsZIP86* is a target gene of miR2105. Subcellular localization and  
45 luciferase activity assays showed that *OsZIP86* is a nuclear transcription factor. *In vivo* and *in vitro*  
46 analyses showed that *OsZIP86* directly binds to the promoter of *OsNCED3*, and interacts with  
47 OsSAPK10, resulting in enhanced-expression of *OsNCED3*. Transgenic rice plants with knock-down  
48 of miR2105 or overexpression of *OsZIP86* showed higher ABA content, more tolerance to drought, a  
49 lower rate of water loss, more stomatal closure than wild type rice ZH11 under drought stress. These  
50 rice plants showed no penalty with respect to agronomic traits under normal conditions. By contrast,  
51 transgenic rice plants with miR2105 overexpression, *OsZIP86* downregulation, or *OsZIP86*  
52 knockout displayed less tolerance to drought stress and other phenotypes. Collectively, our results show  
53 that a regulatory network of ‘miR2105-OsSAPK10/*OsZIP86*-*OsNCED3*’ control ABA biosynthesis in  
54 response to drought stress.

55

56 **Keywords:** abscisic acid, biosynthesis, drought, miRNA, rice, transcription factor.

57

58 **Introduction**

59 Rice (*Oryza sativa* L.) is one of the most important grain crops in the world, and both biotic and abiotic  
60 stresses are major threats to its yield. Therefore, breeding programs are directed towards increasing  
61 yield and improving tolerance to biotic and abiotic stresses (Kumar *et al.*, 2018). To cope with most  
62 stresses, plants synthesize abscisic acid (ABA), which activates ABA-mediated signaling pathways,  
63 including stomatal closure under drought stress, metabolic adjustment, growth regulation and  
64 regulation of defense-related genes (Finkelstein *et al.*, 2002; Joo *et al.*, 2020). Therefore, ABA is one of  
65 the most important phytohormones regulating plant growth, development, and stress response  
66 (Nambara & Marion-Poll, 2005; Chen *et al.*, 2020). The core components of ABA biosynthesis,  
67 catabolism, transport, and signaling have been identified (Chen *et al.*, 2020). ABA is synthesized in the  
68 plastids and the cytosol from zeaxanthin in a five-step biosynthetic process in *Arabidopsis*. The first

69 three steps of conversion from the precursor  $\beta$ -carotene to violaxanthin and neoxanthin, which are  
70 catalyzed by ABA DEFICIENT 1 (ABA1), ABA4, and 9-*cis*-epoxycarotenoid dioxygenases (NCEDs),  
71 take place in the plastids; violaxanthin and neoxanthin are then transported into the cytosol for the next  
72 two steps, in which ABA is produced by the catalysis of ABA2 and ABA3 in Arabidopsis (Nambara &  
73 Marion-Poll, 2005; Chen *et al.*, 2020).

74 NCEDs cleave violaxanthin and neoxanthin to produce xanthoxin in the ABA biosynthetic pathway;  
75 this is the rate-limiting step of ABA *de novo* biosynthesis (Nambara & Marion-Poll, 2005; Dong *et al.*,  
76 2015). *NCEDs* belong to a multigene family in plants, and their expression is tightly regulated in  
77 response to developmental or stress conditions. Rice has five *NCEDs*. *OsNCED1* is most highly  
78 expressed in leaves as a housekeeping gene under normal conditions and is feedback-regulated by ABA,  
79 suppressed by water stress, and induced in cold-stressed anthers (Ye *et al.*, 2011). *OsNCED2* has roles  
80 in the seed germination (Zhu *et al.*, 2009) and grain ABA production (Nonhebel & Griffin, 2020).  
81 *OsNCED3*, *OsNCED4* and *OsNCED5* mediate ABA biosynthesis, and confer to different stress  
82 tolerance (Huang *et al.*, 2018; Hwang *et al.*, 2018; Huang *et al.*, 2019). *OsNCED3* is constitutively  
83 expressed in various tissues under normal conditions, and responses to multi-abiotic stresses in plant  
84 growth (Huang *et al.*, 2018). The expression of *OsNCED3* is rapidly induced by drought stress and  
85 quickly decreased after rehydration; thus, it is a major gene promoting ABA biosynthesis during  
86 drought stress in rice (Ye *et al.*, 2011; Mao *et al.*, 2017; Liu *et al.*, 2018).

87 The 20–22 nucleotide microRNAs (miRNAs) have critical roles in both plant development and  
88 biotic and abiotic stress responses, including ABA response (Nadarajah & Kumar, 2019). miRNAs can  
89 regulate gene expression at post-transcriptional levels through specific base-pairing to target mRNAs  
90 (Bartel, 2004). In rice, a series of miRNAs, such as miR156, miR159, miR168, miR169, miR319, and  
91 miR395 are involved in various stress response (Zhou *et al.*, 2010). miR159 is induced by drought  
92 stress and provides tolerance against abiotic stresses such as drought in rice (Mohsenifard *et al.*, 2017).  
93 miR319 is also induced by salinity and drought stress and makes a positive contribution to the plant  
94 abiotic stress response (Koyama *et al.*, 2017). In Arabidopsis, miR165 and miR166 regulate expression  
95 of BG1, a glucosidase; BG1 hydrolyzes Glc-conjugated ABA, which in turn further modulates ABA  
96 homeostasis (Yan *et al.*, 2016). miR2105 has been isolated from developing rice seeds (Xue *et al.*,  
97 2009), but its role has remained elusive.

98 The bZIP transcription factors (TFs) also have crucial regulatory roles in activating ABA-dependent

99 stress-responsive gene expression (Joo *et al.*, 2021). It is predicated that rice encodes 89 bZIP TFs,  
100 several of which have been found to be involved in rice stress responses (Joo *et al.*, 2021). For example,  
101 OsbZIP23 positively regulates the transcription of *OsNCED4* to mediate ABA biosynthesis (Xiang *et*  
102 *al.*, 2008; Zong *et al.*, 2016). OsbZIP71 directly binds to G-box sequences in the promoters of *OsNHX1*  
103 and *COR413-TM1* to contribute to drought and salt tolerance (Liu *et al.*, 2014). Rice OsbZIP86  
104 (previously known as osZIP-1a) is a homolog of wheat G-box-binding factor EmBP-1; overexpression  
105 of *osZIP-1a* in rice protoplasts can enhance expression from the wheat *Em* gene promoter containing  
106 G-boxes only in the presence of ABA (Nantel & Quatrano, 1996). Moreover, phosphorylated OsbZIP72  
107 directly binds to the G-box in the promoter of *AOC*, and activates *AOC* transcription (Wang *et al.*,  
108 2020).

109 Members of the phosphorylation-activated sucrose nonfermenting 1-related protein kinase 2 (SnRK2)  
110 have also been reported to have crucial roles in phosphorylating AREB/ABF TFs, and subsequently  
111 activating downstream genes to respond to ABA signals (Banerjee & Roychoudhury, 2017). The rice  
112 SnRK2 protein family contains 10 members, denoted stress/ABA-activated protein kinase 1 (SAPK1)  
113 to SAPK10 (Kobayashi *et al.*, 2004). Among them, SAPK1, SAPK2, SAPK6, SAPK8, SAPK9, and  
114 SAPK10 have been reported to be functionally related to ABA signaling (Wang *et al.*, 2020; Fu *et al.*,  
115 2021). SnRK2s usually function through their potential substrate proteins. A few TFs have been  
116 identified as SnRK2 substrates, including ABI5, OsbZIP23, OsbZIP46, OsbZIP62 and OsbZIP72  
117 (Rehman *et al.*, 2021).

118 Previous efforts have provided evidence that miRNAs and bZIP TFs contribute to ABA biosynthesis  
119 in regulating drought resistance (Nadarajah & Kumar, 2019). However, regulation pathway of ABA  
120 biosynthesis and the cross talk between miRNAs and target genes are not well understood in rice. Here,  
121 we report that *OsbZIP86*, the target gene of miR2105, regulates drought-induced ABA biosynthesis  
122 through directly increasing the expression of *OsNCED3* to modulate drought tolerance, without penalty  
123 with respect to main agronomic traits under normal conditions. OsSAPK10 can interact with OsbZIP86,  
124 and increase *OsNCED3* promoter activity. Taken together, our results demonstrate the crucial  
125 importance of the ‘miR2105-OsSAPK10/OsbZIP86-*OsNCED3*’ module in mediating ABA biosynthesis  
126 under drought stress.

127

128

129 **Results**

130 ***OsbZIP86* is a target gene of miR2105**

131 Previously, we identified a drought-repressed miRNA osa-miR2105 (miR2105) from rice seedlings by  
132 miRNA sequencing; this miRNA was also isolated from developing rice seeds (Xue *et al.*, 2009; Yi *et*  
133 *al.*, 2013). In order to investigate the functions of miR2105 in stress responses in rice, we detected its  
134 expression under ABA, drought, and salt treatments by real-time qRT-PCR. The expression of  
135 miR2105 was repressed under ABA treatment in wild-type rice ZH11 seedlings (Figure 1A). miR2105  
136 was also downregulated after 0.5–4 h of water deficiency treatment and returned to relatively high  
137 expression levels after 1 h of re-watering (Figure 1B). Expression of miR2105 was also downregulated  
138 by NaCl treatment (Figure 1C). These results suggest that miR2105 is an ABA-, drought-, and  
139 salt-repressed miRNA.

140 It is well known that miRNAs exert their functions by inhibiting the expression of their target genes  
141 (Bartel, 2004). To identify the target gene of miR2105, we used two methods to identify its downstream  
142 targets. A total of 13 genes were predicted to be targets of miR2105 using psRNATarget  
143 (<http://plantgrn.noble.org/psRNATarget/>) (Supplemental Table S1). To further validate the targets, we  
144 generated miR2105-overexpressing (miR2105-ox) and miR2105-downregulation lines (STTM2105)  
145 (Supplemental Figure S1A,B). Among the predicted 13 target genes, *OsbZIP86* (LOC\_Os12g13170)  
146 (Nijhawan *et al.*, 2008) was downregulated in the T<sub>2</sub>–T<sub>4</sub> generations of miR2105-ox and upregulated in  
147 the T<sub>2</sub>–T<sub>4</sub> generations of STTM2105 (Figure 1D and Supplemental Figure S2A). These results show  
148 that the expression change of *OsbZIP86* occurred in the opposite direction to that of miR2105 in  
149 miR2105-ox and STTM2105.

150 To further confirm *OsbZIP86* as a target gene of miR2105, a 5' RNA ligase-mediated rapid  
151 amplification of cDNA ends (5'-RLM-RACE) assay was performed *in vivo* using ZH11 seedlings  
152 grown under normal condition. Sequencing of the 5'-RLM-RACE clones revealed that *OsbZIP86*  
153 mRNA was cleaved at the miR2105/*OsaOsbZIP86* mRNA complementary site (Figure 1E). We also  
154 searched the *OsbZIP86* expressed sequence tags (ESTs) in the NCBI database and found that an EST  
155 (CF324346) had its first base pair located within the complementary site. Collectively, these data  
156 demonstrated that miR2105 could direct cleavage of *OsbZIP86* mRNA to regulate transcript levels of  
157 *OsbZIP86*.

158

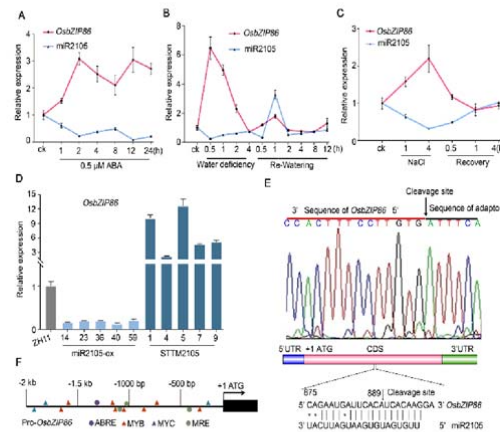

160 *OsbZIP86* (*osZIP-1a*) belongs to the OsbZIP TF family (Nantel & Quatrano, 1996; Nijhawan *et al.*,  
161 2008), and its promoter contains putative stress response-related *cis*-elements (Figure 1F). Through  
162 searching the Rice eFP database (<http://bar.utoronto.ca/efprice/cgi-bin/efpWeb.cgi>), we found that  
163 drought stress could significantly induce *OsbZIP86* expression, and *OsbZIP86* also responded to salt  
164 stress (Supplemental Figure S2C,D). Our qRT-PCR results also showed that expression of *OsbZIP86*  
165 was induced, whereas miR2105 expression was repressed after ABA and salt treatments in ZH11  
166 seedlings (Figure 1A,C). *OsbZIP86* and miR2105 were up- and downregulated, respectively after 0.5–  
167 2 h of water-pouring-out treatment (Figure 1B). miR2105 expression rapidly increased within 0.5–1 h  
168 recovery; by contrast, *OsbZIP86* expression returned to its normal level after 2–12 h of re-watering  
169 (Figure 1B). Thus, *OsbZIP86* showed the opposite trend of expression change to that of miR2105 in  
170 ZH11 seedlings under ABA, salt, and drought treatments. To further evaluate the expression pattern of  
171 *OsbZIP86* in different tissues, qRT-PCR was performed. The results showed that *OsbZIP86* was mainly  
172 expressed in the stem, followed by the leaf sheath and young leaf (Supplemental Figure S2B), similar  
173 to the results from the Rice eFP database (Supplemental Figure S2E,F). GUS staining of *OsbZIP86pro*:  
174 *GUS* rice also showed that *OsbZIP86* was highly expressed in young leaf, leaf sheath, stem, and seed,  
175 with lower expression in the panicle (Supplemental Figure S2G), consistent with the qRT-PCR data  
176 (Supplemental Figure S2B). The temporal and spatial expression patterns of miR2105 and *OsbZIP86* in  
177 ZH11 also showed highly negative correlations at the same growth phases (Supplemental Figure S2B).  
178 Therefore, we concluded that ABA, salt, and drought repressed expression of miR2105, resulting in  
179 increased expression of *OsbZIP86*.

180 To test the subcellular localization of OsbZIP86, its the coding sequence (CDS) was fused with *GFP*  
181 and introduced into rice protoplasts using PEG (Supplemental Figure S3A). The recombinant  
182 OsbZIP86-GFP was found to exclusively co-localize with a nuclear marker, NSL-rk-mCherry  
183 (Supplemental Figure S3A). The stable *Ubi: OsbZIP86-GFP* transgenic rice also showed that the green  
184 fluorescence signal of the OsbZIP86-GFP fusion protein was located in the nuclei of root cells  
185 (Supplemental Figure S3B). These data showed that OsbZIP86 is a nuclear-localized protein.

186

### 187 **miR2105 and *OsbZIP86* had opposite effects on the tolerance of rice to drought and salt stresses**

188 To determine the detailed functions of *OsbZIP86* and miR2105 in response to different stresses in rice,  
189 they were used to generate transgenic rice (Supplemental Figure S1), which were subsequently tested



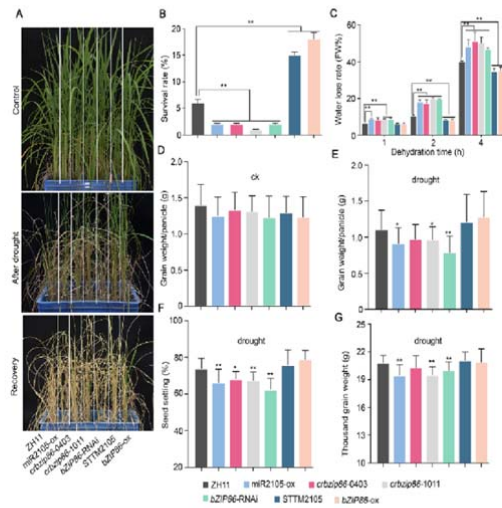

**Figure 2.** miR2105 and *OsbZIP86* mediate drought-resistance and grain yield of rice under drought condition.

(A–B) Phenotypes (A) and survival rates (B) of transgenic rice seedlings under drought treatment. Two-week-old rice seedlings were grown in boxes with sandy soil, water was poured out, and irrigation was stopped for 2 weeks until the leaves wilted for 3 d (middle); then, irrigation was resumed for 1 week (bottom), and the seedlings were watered as the control (top). (C) Water loss rate in detached leaves of the transgenic rice seedlings. Values are means  $\pm$  SD of 30 independent plants. (D–E) Grain weights per panicle under normal (D) and drought conditions (E). (F–G) Seed setting rate (F) and thousand grain weight (G) under drought treatment. All plants were grown in boxes filled with sandy soil. For drought treatment (F–G), all plants were grown under normal conditions until flowering, then all the water in the boxes was poured out and watering was stopped for 1 week, before plants were recovered with water for 3 d. Lacunar drought treatment was carried out from flowering to mature grain. The experiments were performed in three replicates with similar results, and two independent lines of each transgenic construction were tested. Each repeat was measured in at least 30 seedlings in (A–B) and in 20 independent plants in (D–G). Values are means  $\pm$  SD; \* $p$  < 0.05, \*\* $p$  < 0.01 according to student's *t*-test in (B–G). miR2105-ox, miR2105 overexpression; *cribzp86-0403*–*1011*, *OsbZIP86*-CRISPR; *bZIP86-RNAi*, *OsbZIP86* RNAi; STTM2105, miR2105 downregulation; *bZIP86-ox*, *OsbZIP86* overexpression.

191 miR2105 and *OsbZIP86* transgenic rice did not show phenotypic difference compared with ZH11,  
192 including with respect to plant growth, stomatal area, seed germination, and the main agronomic traits  
193 (Figure 2A,D, 3, 6, and Supplemental Figure S4). However, when these transgenic rice seedlings were  
194 recovered after water deficiency stress, the seedling survival rate of ZH11 was about 7%, whereas  
195 those of STTM2105 and *bZIP86*-ox seedlings ranged from 15% to 18%, and those of miR2105-ox,  
196 *crbzip86*, and *bZIP86*-RNAi seedlings ranged from 0% to 2% (Figure 2A,B). The leaf water loss rates  
197 of STTM2105 and *bZIP86*-ox seedlings were slower whereas those of miR2105-ox, *crbzip86*, and  
198 *bZIP86*-RNAi were faster than those of ZH11 under dehydration conditions (Figure 2C). To test the  
199 effects of *OsbZIP86* and miR2105 on agronomic traits under drought conditions, the transgenic rice  
200 were grown in boxes filled with sandy with lacunar drought. We found that miR2105-ox, *crbzip86*, and  
201 *bZIP86*-RNAi plants showed lower grain weight per panicle, seed setting, and thousand grain weight  
202 than ZH11 plants, whereas STTM2105 and *bZIP86*-ox did not show any significant difference  
203 compared with ZH11 (Figure 2E–G). STTM2105 and *OsbZIP86*-ox also enhanced the salt stress  
204 tolerance of rice; by contrast, miR2105-ox, *crbzip86*, and *bZIP86*-RNAi decreased salt stress tolerance  
205 during the seed germination and seedling stages (Supplemental Figure S4). These results indicated that  
206 decreased miR2105 expression and increased *OsbZIP86* expression improved the drought and salt  
207 tolerance of rice, whereas increased miR2105 expression and decreased *OsbZIP86* expression reduced  
208 the drought and salt tolerance of rice.

209 When the transgenic rice were grown under water deficiency conditions, the stomatal areas of  
210 miR2105-ox, *crbzip86*, and *bZIP86*-RNAi plants were smaller whereas those of STTM2105 and  
211 *bZIP86*-ox plants were larger than those of ZH11 (Figure 3A,B). In addition, more stomata were  
212 completely closed and fewer stomata were completely open in STTM2105 and *bZIP86*-ox leaves  
213 compared with ZH11. The opposite tendency was observed for miR2105-ox, *crbzip86*, and  
214 *bZIP86*-RNAi (Figure 3C,D). These results indicate that miR2105 and *OsbZIP86* plays positive and  
215 negative roles in stomata movement under water deficiency, respectively (Figure 3).

216

### 217 ***OsbZIP86* directly binds to the promoter of *OsNCED3***

218 Given that *OsbZIP86* had been demonstrated to bind to the G-box motif of the wheat *Em* promoter  
219 (Nantel & Quatrano, 1996), and promoters of ABA biosynthetic and metabolic genes (Huang *et al.*,  
220 2018) including *OsNCED1–5* and *OsABA8ox1–3* harbored G-box *cis*-elements, we checked whether

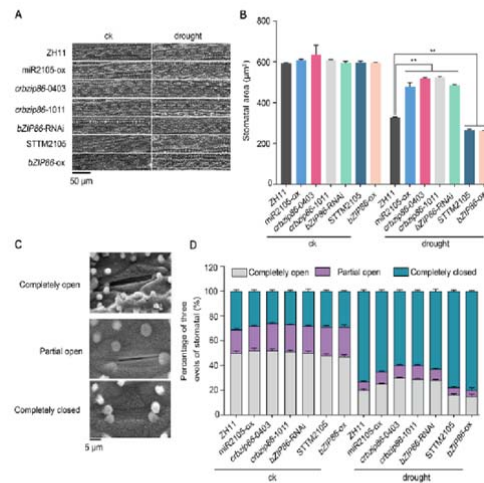

**Figure 3.** miR2105 and *OsbZIP86* mediate leaf stomatal opening in rice.

(A) Stomatal arrangement in abaxial leaf blade. (B) Area per stomatal pore. (C) SEM images of three levels of stomatal opening. (D) Statistics of stomatal opening state. Eight-week-old seedling leaves of ZH11, miR2105, and *OsbZIP86* transgenic rice plants were measured before (ck) and after drought stress. All images were continuously observed by SEM. Six seedlings of each line were used for measurement, and 180 stomata per line were measured (B and D). The experiments were performed in three biological replicates with similar results. Values shown are means  $\pm$  SD of six independent seedlings. \* $p < 0.05$ , \*\* $p < 0.01$  according to student's *t*-test.

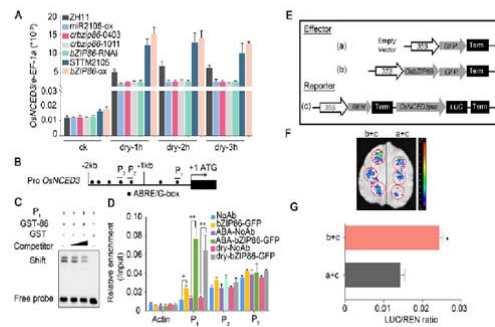

**Figure 4.** OsbZIP86 binds to the G-box of *OsNCED3* promoter to regulate its expression.

(A) Expression levels of *OsNCED3* in miR2105 and *OsbZIP86* transgenic rice under normal conditions (ck) and drought stress. The rice *e-EF-1a* gene was used as the internal control. Data represent means  $\pm$  SD (n = 3). All qRT-PCR analyses for gene expression were performed in three biological replicates with similar results. (B) G-box elements (black dot) in 2-kb *OsNCED3* promoter region. P<sub>1</sub>, P<sub>2</sub>, and P<sub>3</sub> represent probe positions for EMSA and amplification regions for ChIP-qPCR. (C) *In vitro* EMSA using G-box sequences from promoter of *OsNCED3* as probes. The P<sub>1</sub> probe was a biotin-labelled fragment of the *OsNCED3* promoter, and the competitor was a non-labelled competitive probe. GST-tagged OsbZIP86 was purified, and 2  $\mu$ g protein was used. The gradient indicates the increasing amount of competitor. GST-86, fusion protein GST-OsbZIP86; GST, negative control. (D) *In vivo* ChIP-qPCR using ZH11 (NoAb, no antibody) and OsbZIP86-GFP overexpressing line (bZIP86-GFP). The anti-GFP antibody was used to precipitate DNA bound to OsbZIP86. Precipitated DNA was amplified with primers overlapping the G-box motif (P<sub>1</sub>, P<sub>2</sub>, and P<sub>3</sub>). For drought and ABA treatment, ZH11 and *OsbZIP86*-6HA-GFP lines were grown in boxes filled with Yoshida solution for 2 weeks, then water was poured out or they were treated with 50  $\mu$ M ABA for 2 h. Values are means  $\pm$  SD from three parallel repeats. NoAb served as a negative control. Rice *Actin* was used as an internal control. (E) Schematic diagram of various constructs for *in vivo* luciferase transient transcriptional activity assay. 35S: *OsbZIP86*-GFP was constructed as the effector. 35S: *REN-OsNCED3pro: LUC* was constructed as the reporter. Free GFP (empty vector) was used as a negative control. (F-G) *In vivo* luciferase activity assay in tobacco leaves. D-luciferin was used as the substrate of luciferase. The expression level of *REN* was used as an internal control. The LUC/*REN* ratio represents the relative activity of the *OsNCED3* promoter. Error bars indicate SD with biological triplicates (n = 3). \**p* < 0.05, \*\**p* < 0.01, according to student's *t*-test in (D and G).

223 *OsNCED3* and *OsABA8ox2* showed slight upregulation in *bZIP86-ox* compared with ZH11  
224 (Supplemental Figure **S5C,G**). However, under drought treatment, expression of *OsNCED3* and  
225 *OsABA8ox2* was significantly upregulated, especially that of *OsNCED3* (Supplemental Figure **S5C,G**).  
226 By contrast, the expression of *OsNCED5* was downregulated in *bZIP86-ox* compared with ZH11  
227 (Supplemental Figure **S5E**). To investigate whether miR2105 affected *OsNCED3* expression,  
228 *OsNCED3* mRNA levels were further analyzed in leaves of miR2105 transgenic rice under normal and  
229 drought stress conditions. Under normal conditions, *bZIP86-ox* and STTM2105 showed slight  
230 upregulation of *OsNCED3* compared with ZH11 (Figure **4A**). However, levels of the *OsNCED3*  
231 transcript were significantly increased after drought treatment in STM2105 and *bZIP86-ox* seedlings,  
232 but significantly decreased in miR2105-ox, *crbzip86*, and *bZIP86-RNAi* seedlings compared with those  
233 in ZH11 (Figure **4A**). These results indicate that OsbZIP86 could promote *OsNCED3* transcription  
234 under drought conditions.

235 To further investigate whether OsbZIP86 could directly bind to the promoter of *OsNCED3*, we  
236 performed Electrophoretic mobility shift assay (EMSA) and Chromatin immunoprecipitation-  
237 quantitative PCR (ChIP-qPCR) to test the DNA-binding ability of OsbZIP86 to the promoter of  
238 *OsNCED3*. Based on the G-box motifs present in the *OsNCED3* promoter (Figure **4B**), we designed  
239 three pairs of specific primers for ChIP-qPCR and three labeled probes for EMSA (Supplemental Table  
240 **S2** and Figure **4B**). We found that OsbZIP86 could specifically bind to the probe 1 (P<sub>1</sub>) region of the  
241 *OsNCED3* promoter (Figure **4C** and Supplemental Figure **S6A**). EMSA binding was substantially  
242 weakened by non-labeled competitive probe in a dosage-dependent manner (Figure **4C**). Subsequently,  
243 ChIP-qPCR was performed to validate this binding *in vivo*, using an anti-GFP antibody and specific  
244 primers. Consistent with the EMSA results, OsbZIP86 was enriched in the P<sub>1</sub> region of the *OsNCED3*  
245 promoter (Figure **4D**). Moreover, the enrichment was significantly enhanced under drought conditions  
246 and ABA treatment (Figure **4D**). These results showed that OsbZIP86 could specifically bind to the P<sub>1</sub>  
247 fragment of the *OsNCED3* promoter, which is 387 bp upstream of the ATG of the *OsNCED3* coding  
248 region (Figure **4B–D** and Supplemental Figure **S6A**). Finally, a dual-luciferase reporting system in  
249 tobacco leaves was used to determine the regulatory effect of OsbZIP86 on *OsNCED3* transcription  
250 (Figure **4E–G**). In comparison with the empty effector, LUC activity was significantly enhanced when  
251 *OsNCED3pro: LUC* was co-transfected with 35S: *OsbZIP86* (Figure **4F–G**). Therefore, we concluded  
252 that OsbZIP86 could bind to the *OsNCED3* promoter to active its transcription, and it was activated by

253 drought and ABA to promote the transcription of *OsNCED3*.

254

### 255 **OsZIP86 interacts with OsSAPK10 to positively regulate *OsNCED3* expression**

256 The SAPKs, which are components of ABA signaling, have been reported to activate bZIP TFs in  
257 plants (Banerjee & Roychoudhury, 2017; Fu *et al.*, 2021). To test whether OsZIP86 interacted with  
258 OsSAPK1-10, luciferase complementation imaging (LCI) in tobacco was performed (Supplemental  
259 Figure **S6B**). We found that OsZIP86 could interact with OsSAPK4, OsSAPK6, OsSAPK7, and  
260 OsSAPK10. Then, we performed a dual-luciferase transient transcriptional activity assay to examine  
261 whether the four OsSAPKs could function cooperatively with OsZIP86 to positively regulate  
262 *OsNCED3* expression. We detected a significant increase in *OsNCED3* promoter activity when  
263 *OsSAPK4*, *OsSAPK7*, and *OsSAPK10* were co-transformed with *OsZIP86* (Figure **5A–C** and  
264 Supplemental Figure **S6C,D**). The transcription level of the *OsNCED3* promoter was most strongly  
265 increased by OsSAPK10 (Figure **5A–C**). The interaction between OsZIP86 and OsSAPK10 was  
266 further confirmed by a pull-down assay *in vitro* and by bimolecular fluorescence complementation  
267 (BiFC) and Co-immunoprecipitation (Co-IP) assays *in vivo* (Figure **5D–F**). These results indicate that  
268 OsSAPK10 may activate OsZIP86 and thus cooperatively regulate *OsNCED3* expression. OsSAPK10  
269 has been reported to positively regulate ABA sensitivity (Min *et al.*, 2007; Wang *et al.*, 2020).  
270 Together, we suggested that OsSAPK10 facilitates OsZIP86 to positively regulate the transcript  
271 expression of *OsNCED3*.

272

### 273 **miR2105 and *OsZIP86* mediate ABA biosynthesis**

274 To test whether endogenous ABA biosynthesis was mediated by miR2105 and *OsZIP86*, we  
275 measured the ABA contents of leaves of transgenic rice (Figure **6A**). When the rice seedlings were  
276 grown under normal conditions, the ABA contents of transgenic rice did not show any difference  
277 compared with those of ZH11 rice (Figure **6A**). However, when they were treated by drought for 4 h,  
278 the ABA contents of miR2105-ox, *crbzip86*, and *bZIP86*-RNAi plants were lower compared with  
279 ZH11, whereas those of STTM2105 and *bZIP86*-ox were higher (Figure **6A**). To investigate whether  
280 exogenous ABA treatment could complement the change in ABA biosynthesis in these transgenic rice,  
281 we performed ABA treatment (Figure **6B–D**). The seedling growth of these transgenic rice plants did  
282 not show any difference compared with that of ZH11 under normal conditions (Figure **6B–D**).

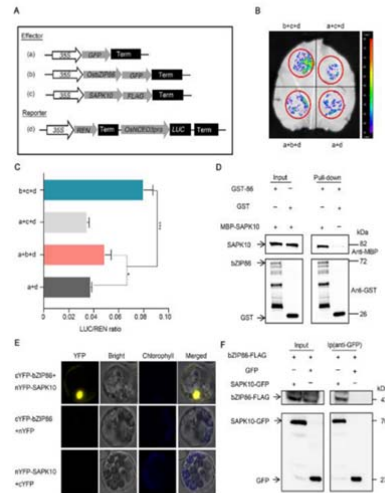

**Figure 5.** OsbZIP86 interacts with and functions cooperatively with OsSAPK10 to positively regulate *OsNCED3* expression. (A) Schematic diagram of various constructs used in the transient transformation assay. Free GFP was used as a negative control. (B–C) *In vivo* luciferase activity assay in tobacco leaves. D-luciferin was used as the substrate of luciferase. The expression level of *REN* was used as an internal control. The LUC/REN ratio represents the relative activity of the *OsNCED3* promoter. Error bars indicate SD with biological triplicates (n = 3). \**p* < 0.05, \*\*\**p* < 0.001 according to student's *t*-test. (D) BiFC analysis of interaction between OsbZIP86 and OsSAPK10 *in vivo*. CDS of *OsbZIP86* and *OsSAPK10* fused with the C-terminus and the N-terminus of yellow fluorescent protein (YFP) were co-transformed into rice protoplasts. Overlaid images show signals for YFP (yellow) and chloroplasts (blue). nYFP alone was used as a negative control. (E) Pull-down analysis of interaction between OsbZIP86 and OsSAPK10 *in vitro*. MBP-OsSAPK10 was incubated with GST or GST-OsbZIP86 proteins, and the immunoprecipitated proteins were detected by an anti-GST antibody. Free GST was used as the negative control. (F) Co-IP analysis of interaction between OsbZIP86 and SAPK10 *in vivo*. GFP, OsSAPK10-GFP, and OsbZIP86-FLAG were co-expressed in tobacco leaves by *Agrobacterium* injection. Total protein extracts were immunoprecipitated with the immobilized anti-GFP antibody (Ip), and the immunoprecipitated protein was then detected by using an anti-FLAG antibody. Input OsSAPK10-GFP and OsbZIP86-FLAG proteins were detected with anti-GFP and anti-FLAG antibodies, respectively. The molecular weights (kDa) and proteins are indicated in the left and right panels, respectively.

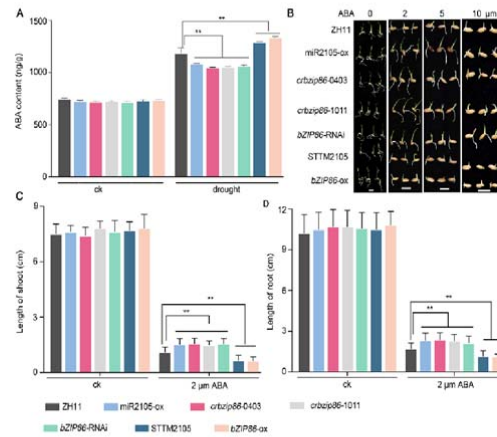

**Figure 6.** miR2105 and *OsbZIP86* mediate leaf ABA biosynthesis of rice under drought conditions.

(A) Leaf ABA content of miR2105 and *OsbZIP86* transgenic rice under normal (ck) and drought stress conditions. Error bars indicate SD for biological triplicates (n = 3). (B) Germination performance of miR2105 and *OsbZIP86* transgenic rice seedlings under ABA treatment. Seeds were placed on double sheets of filter paper in a 9-cm Petri dish and moistened with distilled water or 2, 5, or 10  $\mu$ M ABA for 7 d. Scale bar, 0.5 cm. (C–D) Lengths of shoots (C) and main roots (D) of miR2105 and *OsbZIP86* transgenic rice seedlings treated with distilled water or 2  $\mu$ M ABA for 7 d. Experiments were performed using three biological replicates with similar results. Each repeat was measured in 30 independent seedlings. Values show means  $\pm$  SD of 30 independent plants. \* $p$  < 0.05, \*\* $p$  < 0.01 according to student's *t*-test (A, C, and D).



285 compared with ZH11 (Figure **6B–D**). This may indicate that exogenous ABA treatment strongly  
286 repressed ZH11 growth and slightly complemented the endogenous ABA insufficiency of miR2105-ox,  
287 *crbzip86*, and *bZIP86*-RNAi plants. Conversely, there was too much ABA in STTM2105 and  
288 *bZIP86*-ox plants after ABA treatment, and this further repressed the growth of these seedlings.  
289 Therefore, we propose that miR2105 and *OsbZIP86* regulate ABA biosynthesis only in the presence of  
290 drought stress.

291

292

293 **Discussion**

294 Plants quickly accumulate ABA to activate a series of stress responses when subjected to abiotic  
295 stresses. When environmental conditions are optimal, the amount of ABA is reduced to basic levels  
296 that promote optimal growth. When plants encounter a non-optimal environment, the regulation of  
297 ABA level in tissues and cells is essential for balancing defense and growth (Chen *et al.*, 2020).  
298 Therefore, excessive ABA levels under normal conditions will adversely affect the normal growth of  
299 plants. Here, we found that miR2105 targeted *OsbZIP86*, regulating its expression at  
300 post-transcriptional levels. *OsbZIP86* directly activates *OsNCED3* transcription by binding to the  
301 G-box in the promoter, and interacts with OsSAPK10, resulting in enhanced-*OsNCED3* expression to  
302 control ABA biosynthesis. Therefore, the drought tolerance of the stable miR2105-overexpressing or  
303 *OsbZIP86*-downregulated transgenic rice plants was enhanced without any penalty with respect to  
304 major agronomic traits under normal conditions. Our findings suggest a molecular breeding strategy for  
305 improving the drought resistance of rice without affecting agronomic traits by using miR2105 or  
306 *OsbZIP86*.

307

308 **miR2105/*OsbZIP86* regulates drought-induced ABA biosynthesis through *OsNCED3***

309 Under water stress, the ABA content in rice leaves can be rapidly induced within 1 h and quickly  
310 decrease to the basal line within 1 h during rehydration (Ye *et al.*, 2011). NCEDs have been reported to  
311 be involved in the rate-limiting step in the ABA biosynthetic pathway (Nambara & Marion-Poll, 2005;  
312 Chen *et al.*, 2020). However, how to regulate expression of *NCEDs* only under abiotic stresses was not  
313 completely clear. Our data showed that the expression of miR2105 in ZH11 plants was repressed by  
314 drought, ABA, and salt treatments; conversely, the expression of *OsbZIP86* was induced (Figure 1A–  
315 C). We found that miR2105 could repress the expression of *OsbZIP86*, and miR2105 could direct to  
316 cleave *OsbZIP86* mRNA (Figure 1D,E). In addition, the transgenic rice plants with changed expression  
317 of *OsbZIP86* and miR2105 showed the expected phenotypic changes under drought conditions (Figure  
318 2, 3 and 6): miR2105 negatively regulated the drought/salt tolerance and ABA sensitivity of the  
319 seedlings, whereas *OsbZIP86* positively regulated these responses (Figure 2, 6 and Supplemental  
320 Figure S4). Therefore, we concluded that *OsbZIP86* is a target gene of miR2105 and its expression  
321 level is regulated by miR2105 under drought salt and ABA treatment.

322 Rice is predicted to have five *OsNCEDs* (Huang *et al.*, 2018; Hwang *et al.*, 2018; Huang *et al.*,

2019), which are tightly regulated in response to developmental or stress conditions (Chen *et al.*, 2020). *OsNCED3*, which encodes a key enzyme in ABA synthesis, has the G-box core sequence 5'-ACGT-3' in its promoter, and its expression is significantly induced by NaCl, PEG, and H<sub>2</sub>O<sub>2</sub> stresses (Huang *et al.*, 2018). *OsbZIP86* is predicted to be a G-box binding factor, and it can bind to and activate the wheat *Em* promoter (Nantel & Quatrano, 1996). Our EMSA, ChIP-qPCR, and luciferase activity assays showed that *OsbZIP86* could directly bind to the *OsNCED3* promoter (Figure 4). We also demonstrated that drought and ABA treatment could enhance the binding ability of *OsbZIP86* to the *OsNCED3* promoter (Figure 4D), suggesting that the function of *OsbZIP86* might be dependent on the ABA signaling pathway. However, the stable transgenic rice plants with altered expression of *OsbZIP86* and miR2105 showed significant differences in *OsNCED3* expression (Figure 4A), ABA content (Figure 6A), and drought tolerance (Figure 2) only when the plants were treated by drought. Of the five rice *OsNCEDs*, only *OsNCED3* showed significant upregulation of expression in *OsbZIP86*-ox plants under drought conditions (Supplemental Figure S5). Therefore, we concluded that *OsbZIP86* is a direct regulator of *OsNCED3*, and that *OsNCED3* expression is regulated under drought stress.

Like *OsNCED3*, *OsNCED5* is expressed in all tissues and regulates ABA biosynthesis and tolerance of rice to salt and water stresses (Huang *et al.*, 2019). However, overexpression of *OsbZIP86* could cause upregulation of *OsABA8ox2* and downregulation of *OsNCED5* under drought treatment (Supplemental Figure S5). *OsbZIP86* has ABRE *cis*-elements for ABA signaling (Figure 1F), suggesting that *OsbZIP86* may positively regulate ABA signaling. The strongly induced expression of *OsNCED3* in *OsbZIP86*-ox (Supplemental Figure S5C) under drought conditions in turn may negatively regulate the expression of *OsNCED5* and positively regulate expression of *OsABA8ox2* to maintain the balance of endogenous ABA.

345

#### 346 **OsSAK10 interacts with OsbZIP86 to regulate the transcript expression of OsNCED3**

347 SnRK2 kinases have been reported to play essential parts in ABA signaling through phosphorylating  
348 AREB/ABF TFs at the post-translational level in *Arabidopsis* (Banerjee & Roychoudhury, 2017).  
349 Several OsSAPKs have been found to phosphorylate rice bZIPs via protein–protein interactions, for  
350 instance, OsSAPK6 can interact with OsbZIP10 (Chae *et al.*, 2007) and OsbZIP46 (Tang *et al.*, 2012;  
351 Kim *et al.*, 2015), OsSAPK2 can interact with OsbZIP23 and OsbZIP46 (Zong *et al.*, 2016), OsbZIP72  
352 can interact with OsSAPK10 and OsSAPK1 (Wang *et al.*, 2020; Fu *et al.*, 2021). We found that

353 OsbZIP86 interacted with OsSAPK10 (Figure **5D–F** and Supplemental Figure **S6B**). Overexpression of  
354 *OsSAPK10* reduced water loss in detached leaves (Min *et al.*, 2019) and increased sensitivity to ABA  
355 (Wang *et al.*, 2020). These phenotypes were similar to those resulting from overexpression of  
356 *OsbZIP86* (Figure **2** and **6**). Moreover, the expression pattern and subcellular localization of  
357 OsSAPK10 (Wang *et al.*, 2020) overlapped with those of OsbZIP86 (Supplemental Figure **S2B** and  
358 Supplemental Figure **S3**). OsSAPK10 could function cooperatively with OsbZIP86 to positively  
359 regulate *OsNCED3* expression (Figure **5A–C**). These results indicate that OsbZIP86 is activated by  
360 OsSAPK10. Taken together, our results suggest that OsbZIP86 may regulate ABA biosynthesis through  
361 *OsNCED3* in an OsSAPK10-dependent manner. Further research is needed to investigate how  
362 OsSAPK10 enhances the activity of OsbZIP86.

363

364 **Overexpression of *OsbZIP86* and downregulation of miR2105 can improve drought tolerance**  
365 **without affecting the main agronomic traits of rice**

366 ABA can improve plant tolerance to abiotic stresses, but ABA induces leaf senescence and negatively  
367 affects the yield of rice. Direct overexpression of ABA biosynthetic genes (such as *OsNCED3*) or its  
368 biosynthetic regulators (such as *OsNAC2*) caused negative effects on leaves and yield, while these  
369 transgenic plants could improve the stress tolerance (Mao *et al.*, 2017; Huang *et al.*, 2018). Therefore,  
370 when the ABA synthesis is promoted only under stress (such as drought), the resistance of plants can  
371 be improved without affecting their growth and development under normal conditions. Thus, these  
372 genes could be used in molecular breeding to improve stress tolerance without negative effects.

373 The transgenic rice with altered expression of miR2105 or *OsbZIP86* showed changes in ABA  
374 contents associated with overexpression of *OsNCED3* only when drought was present (Figure **6A**),  
375 leading to changes in the drought resistance in rice seedlings (Figure **2** and **3**). These data indicate that  
376 miR2105 and *OsbZIP86* regulate ABA biosynthesis to enhance drought tolerance through *OsNCED3*  
377 only under drought conditions, while not affecting aspects of rice growth including plant height, tiller  
378 numbers, seed setting percentage, and thousand seed weight under normal conditions (Supplemental  
379 Figure **S7**). However when treated with lacunar drought and salt, the seed setting percentage, thousand  
380 seed weight, and grain yield per panicle of *crbzip86*, *bZIP86*-RNAi, and miR2105-ox were lower than  
381 those of ZH11 (Figure **2E–G** and Supplemental Figure **S4G–I**). miR2105-ox and *bZIP86*-ox showed  
382 no significant differences compared with ZH11, possibly owing to the insufficient drought and salt

383 treatments. These results imply that altered expression of miR2105 or *OsbZIP86* had no impact on rice  
384 growth and development under normal conditions but could improve the stress resistance of rice under  
385 drought and salt stresses; this is different from other genes for they may exert negative effects on  
386 normal rice growth when promoting ABA biosynthesis (Kasuga *et al.*, 2004; Ito *et al.*, 2006).  
387 Therefore, miR2105 and *OsbZIP86* may have potential for use in promoting drought tolerance without  
388 penalty to major agronomic traits under normal conditions.

389 In summary, we have proposed a working model of how *OsbZIP86* is regulated by miR2105 and  
390 *OsSAK10* to control ABA biosynthesis through *OsNCED3* and functions in regulating drought  
391 resistance in rice (Figure 7). Under drought stress, the expression of miR2105 is repressed, whereas the  
392 expression of *OsbZIP86* is induced. Then, *OsbZIP86* is activated by *OsSAPK10* through direct  
393 interaction, thereby promoting the expression of *OsNCED3* by directly binding to the promoter. The  
394 upregulated *OsNCED3* plays an important part in the regulation of ABA biosynthesis to modulate  
395 drought resistance.

396

## 397 **Materials and Methods**

### 398 **Vector construction and rice transformation**

399 To generate *osa*-miR2105-overexpression rice (miR2105-ox), a mature 20-base-pair (bp) sequence  
400 (MI0010566) of miR2105 was downloaded from miRBase (<http://www.mirbase.org>). The cloning  
401 procedure for miR2105-ox followed the description at  
402 <http://wmd3.weigelworld.org/cgi-bin/webapp.cgi>. The artificial *osa*-miR2105 was inserted downstream  
403 of the 35S promoter in pCAMBIA1301 (<http://www.cambia.org>). To downregulate *osa*-miR2105  
404 (STTM2105), the short tandem target mimic method was used as described previously (Yan *et al.*,  
405 2012). The fragment  
406 (GAAGCTTTTTGTGATGTGAATGATTCATGTTGTTGTTGTTATGGTCTAGTTGTTGTTGTTAT  
407 GGTCTAATTTAAATATGGTCTAAAGAAGAAGAATATGGTCTAAAGAAGAAGAAATTTGTGA  
408 TGTGAATGATTCATGGATCCA) was synthesized by Invitrogen<sup>TM</sup> (China) and inserted downstream  
409 of the *Ubi-1* promoter in pXU1301 (modified from pCAMBIA1301; the 35S promoter was replaced by  
410 the *Ubi-1* promoter). Therefore, the fragment contained two target mimic sequences (underlined).

411 For overexpression of *OsbZIP86* (*bZIP86*-ox), the CDS of *OsbZIP86* was amplified from *Oryza*  
412 *sativa* L. cv “Zhonghua 11” (ZH11) and subcloned into pXU1301 to produce a 6×HA–GFP fusion

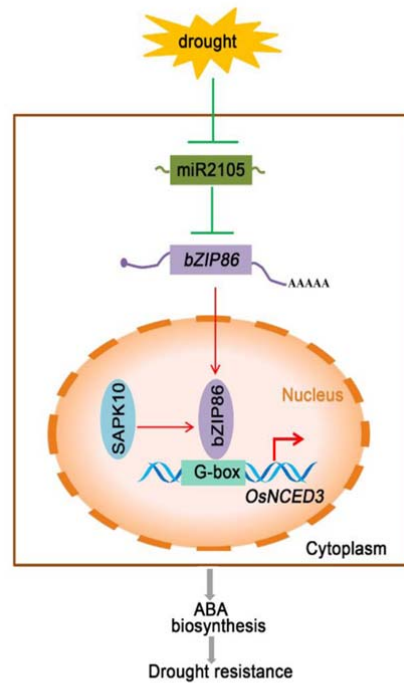

**Figure 7.** Working model of ‘miR2105-OsbZIP86-OsNCED3’ module functions in regulating drought resistance

Under drought stress, the expression of miR2105 is repressed, whereas the expression of *OsbZIP86* is induced. Then, *OsbZIP86* is activated by *OsSAPK10* through direct interaction, thereby promoting the expression of *OsNCED3*. The upregulated *OsNCED3* has an important role in regulating ABA biosynthesis to modulate drought resistance. Arrowheads show positive regulation; flat-ended lines show negative regulation.

414 *OsbZIP86* CDS (391 bp) were inserted downstream of the *Ubi-1* promoter in the rice RNA interference  
415 (RNAi) vector pTCK303 (Wang *et al.*, 2004). The *osbzip86* mutants (*crbzip86*) were generated by a  
416 CRISPR/Cas9 genome-editing system (Ma *et al.*, 2015). The targets selected are listed in Supplemental  
417 Figure S1E. Individual T<sub>0</sub> transformants were analyzed by sequencing their *OsbZIP86* target regions,  
418 which were amplified by PCR. To generate *OsbZIP86pro: GUS* transgenic plants, an approximately  
419 2-kb promoter sequence of *OsbZIP86* was cloned and inserted into pCAMBIA1301.

420 All the above-mentioned constructs were introduced into *Agrobacterium tumefaciens* strain EHA105,  
421 and ZH11 was transformed by *Agrobacterium*-mediated transformation. All the primers used in this  
422 study are listed in Supplemental Table S2.

423

#### 424 **5'-RLM-RACE assay**

425 Total RNA from tillering stage leaf sheaths of ZH11 was directly ligated to a synthesized RNA adaptor  
426 (GCUGAUGGCGAUGAAUGAACACUGCGUUUGCUGGCUUUGAUGAAA). The cDNA was  
427 amplified by nested PCR, and the final PCR product was gel-purified and subcloned into the pGEM-T  
428 Easy Vector (Promega, Guangzhou, China) for sequencing. Other processes for 5'-RLM-RACE were  
429 as previously described (Xia *et al.*, 2015a). The primers are listed in Supplemental Table S2.

430

#### 431 **Plant growth conditions and stress treatments**

432 All the rice used in this study was generated from ZH11. The seeds were surface-sterilized in 70% (v/v)  
433 ethanol for 30 s and then in 2.5% NaClO (w/v) solution for another 40 min, followed by several rinses  
434 with sterile water. Then, seeds were incubated in darkness at 28 °C for 2 d to induce germination. The  
435 rice were grown under controlled field conditions in Guangzhou, China, or in boxes filled with Yoshida  
436 solution at 30 °C with a 14 h/10 h light/dark period.

437 To determine the effects on gene expression of ABA, water deficiency, and salt treatments,  
438 2-week-old ZH11 seedlings grown in Yoshida solution were supplied with 0.5 μM ABA for different  
439 times, exposed to air for 4 h, or treated with 150 mM NaCl for 4 h. The seedlings were then transferred  
440 to Yoshida solution again for recovery.

441 For drought tolerance test, 2-week-old rice seedlings were grown in boxes filled with sandy soil and  
442 grown for 2 weeks; then, all the water in the boxes was poured out and watering was stopped for 2  
443 weeks until the seedling wilted for 3 d and recovery 1 week. Photographs were taken and the surviving

444 seedlings were counted.

445 For the ABA sensitivity test at the seedling stage, transgenic rice seeds were placed on double sheets  
446 of filter paper in a 9-cm Petri dish and moistened with distilled water or different concentrations of  
447 ABA (2, 5, or 10  $\mu$ M) for 7 d. Lengths of shoots and roots were measured. Three replicates were tested  
448 for each plant line. Thirty seeds were measured for each replicate. Leaf ABA contents were measured  
449 using a Phytodetek competitive ELISA kit (Mlbio, Shanghai, China). ABA was extracted as described  
450 previously (Fukumoto *et al.*, 2013).

451 To examine the effects of salt on seedling growth, 4-week-old-seedlings were transferred to Yoshida  
452 solution with 150 mM NaCl and allowed to grow for 10 d. Photographs were taken and the surviving  
453 seedlings were counted.

454

#### 455 **Water loss rate and stomatal closure**

456 To detect the water loss rate under dehydration conditions, leaves of 2-week-old rice seedlings were cut  
457 into 1-cm lengths, exposed to air at room temperature in the dark, and weighed at different times; the  
458 water loss rate was calculated as the percentage of total weight lost compared with the initial weight at  
459 each time point (Miao *et al.*, 2020). Stomatal closure was examined according to the method described  
460 previously (Miao *et al.*, 2020). Leaves from 8-week-old rice grown under normal or drought stress  
461 conditions were cut in 0.1-cm<sup>2</sup> pieces and fixed in 2.5% glutaraldehyde solution with 0.1 M  
462 phosphate-buffered saline (pH 7.2). Stomatal status was monitored by scanning electron microscopy  
463 (SEM) (SU8010, Hitachi, Japan); the SEM analysis was performed as described previously (Xia *et al.*,  
464 2015b). Six individual plants from the ZH11 and transgenic rice lines were used for measurements of  
465 the stomatal aperture, with 30 stomata measured per plant.

466

#### 467 **RNA extraction and reverse transcription PCR (RT-PCR)**

468 The extraction of small RNA and total RNA from rice, reverse transcription and quantitative RT-PCR  
469 (qRT-PCR) amplification were performed as previously described (Xia *et al.*, 2015a). *OsbZIP86*  
470 expression during the plants' entire growth life was verified using data from RiceXpro  
471 (<http://ricexpro.dna.affrc.go.jp/>).

472

#### 473 **$\beta$ -glucuronidase (GUS) assay**



474 The GUS assay was carried out as described previously (Liu *et al.*, 2021) with minor modifications.  
475 Transgenic plant tissues were incubated in GUS staining solution (Sangon, Shanghai, China).  
476 Following vacuum infiltration, the samples were incubated at 37 °C for 16 h. After staining, the tissues  
477 were bleached with 70% ethanol and photographed under a light microscope (Leica DVM6, Leica  
478 Microsystems, Germany).

479

#### 480 **Subcellular localization of OsbZIP86**

481 To determine the subcellular localization of OsbZIP86, the CDS of *OsbZIP86* was cloned into the  
482 pUC18 vector, which we had modified to produce an OsbZIP86-GFP fusion construct driven by the  
483 CaMV35S promoter (*35S: OsbZIP86-GFP*). Rice protoplasts prepared from etiolated shoots were  
484 co-transformed with *35S: OsbZIP86-GFP* and *NSL-mCherry* (a nuclear marker) using polyethylene  
485 glycol (PEG). In addition, the CDS of *OsbZIP86-GFP* was cloned into the pXU1301 vector, and the  
486 fusion construct (*Ubi: OsbZIP86-GFP*) was introduced into *EHA105* to create transgenic rice. The  
487 fluorescence signal was observed with a confocal laser scanning microscope (Leica SP8 STED 3X,  
488 Leica Microsystems, Germany). The primers are listed in Supplemental Table S2.

489

#### 490 **Dual-luciferase assay of transiently transformed tobacco leaves**

491 To generate the luciferase reporter construct for the dual-luciferase assay, the 2-kb promoter sequence  
492 of *OsNCED3* was amplified from rice and inserted into a pGreenII0800-LUC vector (Hellens *et al.*,  
493 2005) using the *HindIII* and *BamHI* sites, respectively. The CDS of *OsbZIP86* and *OsSAPKs* were  
494 cloned into the pCAMBIA1300-GFP and pHB-3×FLAG vectors, respectively, as the effectors. The  
495 tobacco leaves were used for dual-luciferase assays as described previously (Hellens *et al.*, 2005). The  
496 effector construct (*35S: OsbZIP86*, *35S: OsSAPKs* or *35S: GFP*) and the reporter construct (*35S:*  
497 *REN-OsNCED3pro: LUC*) were introduced into *A. tumefaciens* strain GV3101 and then infiltrated into  
498 3-week-old tobacco leaves by *Agrobacterium* injection. The activities of firefly luciferase (LUC) and  
499 Renilla luciferase (REN) were measured using a Dual-Luciferase Reporter Assay System (E2920,  
500 Promega, USA). The LUC activity was normalized to the REN activity. The primers are listed in  
501 Supplemental Table S2.

502

#### 503 **EMSA and pull-down assay**

504 The EMSA and pull-down assays were performed as described previously (Wang *et al.*, 2020). The  
505 CDS of *OsbZIP86* and *OsSAPK10* were cloned into the pGEX4T-1 and pMAL-c2x vectors to generate  
506 GST-OsbZIP86 and MBP-OsSAPK10 fusion proteins, respectively. These recombinant vectors were  
507 transformed into *Escherichia coli* strain BL21. Fusion proteins were induced with 0.5 mM Isopropyl  
508  $\beta$ -D-Thiogalactoside (IPTG) at 20°C for 12 h. The fusion proteins (GST-OsbZIP86 and  
509 MBP-OsSAPK10) were purified using Glutathione Sepharose 4B (GE Healthcare, USA) and Amylose  
510 Magnetic Beads (New England Biolabs, USA) according to the manufacturer's protocols, respectively.  
511 For the EMSA assay, complementary single-stranded oligonucleotides derived from 40 bp of the  
512 G-box region of the *OsNECD3* promoter were synthesized as DNA probes. The probes were  
513 synthesized by Invitrogen (Shanghai, China). EMSA was performed using a LightShift™  
514 Chemiluminescent EMSA Kit (Thermo, No. 20148) following the manufacturer's protocol. For the  
515 pull-down assay, GST-OsbZIP86 and MBP-OsSAPK10 were incubated with Glutathione Sepharose 4B  
516 (GE Healthcare, USA) in pull-down buffer (50 mM Tris-HCl, pH 7.5, 100 mM NaCl, 0.25% Triton  
517 X-100, 35 mM  $\beta$ -mercaptoethanol) at 4 °C for 3 h. After washing six times with pull-down buffer, the  
518 pulled proteins were eluted by boiling and further analyzed by immunoblotting using anti-GST. The  
519 primers and EMSA probes are listed in Supplemental Table S2.

520

#### 521 **ChIP-qPCR assay**

522 The ChIP-qPCR assay was performed as described previously (Wang *et al.*, 2020). Briefly, 3 g of  
523 leaves from 2-week-old seedlings of ZH11 and *OsbZIP86*-6HA-GFP lines grown under normal  
524 conditions or treated with 50  $\mu$ M ABA or subjected to water deficiency for 2 h were cross-linked twice  
525 by 3% formaldehyde for chromatin isolation under vacuum for 15 min and stopped using 2 M glycine.  
526 Then the samples were ground to powder in liquid nitrogen prior to isolating chromatin. After  
527 sonication, the chromatin complexes were incubated with GFP-Trap Agarose (Chromotek, USA). DNA  
528 was purified using a PCR purification kit (DNA Clean & Concentrator-5, Tianmo Biotech) and  
529 recovered in water for qPCR analysis. Primers were selected in the promoter regions of *OsNCED3*  
530 (Supplemental Table S2). The amount of precipitated DNA was calculated relative to the total input  
531 chromatin and expressed as a percentage of the total according to the formula: % input =  $2^{\Delta Ct} \times 100\%$ ,  
532 where  $\Delta Ct = Ct(\text{input}) - Ct(\text{IP})$ , and Ct is the mean threshold cycle of the corresponding PCR reaction.  
533 The ChIP experiments were repeated three times with the similar results.

534

535 **LCI assay**

536 The CDS of *OsbZIP86* and *OsSAPKs* were cloned into the pCAMBIA1300-NLuc and  
537 pCAMBIA1300-CLuc LUC vectors (Chen *et al.*, 2008), respectively. All of the constructs were  
538 introduced into *A. tumefaciens* strain GV3101, which was then co-transformed into 3-week-old tobacco  
539 leaves by *Agrobacterium* injection. One millimolar luciferin was sprayed onto leaves to detect the  
540 fluorescence signal after 2.5 d infiltration under a plant *in vivo* imaging system (LB985 NightSHADE).  
541 The details were examined according to the method described previously (Chen *et al.*, 2008).

542

543 **BiFC assay**

544 The CDS of *OsbZIP86* and *OsSAPK10* were cloned into the pSATN-cYFP-C1 and pSATN-nYFP-C1  
545 vectors (Citovsky *et al.*, 2006), respectively. The constructed vectors were transiently cotransformed  
546 into rice protoplasts using PEG. Transfected cells were imaged using a confocal spectral microscope  
547 imaging system (Leica, SP8 STED 3X, Germany).

548

549 **Co-IP assay**

550 Co-IP was performed as described previously (Wang *et al.*, 2020). To generate epitope-tagged  
551 expression vectors for Co-IP, the CDS of *OsbZIP86* and *OsSAPK10* were fused with sequences  
552 encoding a FLAG tag (vector:pHB-3×FLAG) and GFP tag (vector:pCAMBIA1300-GFP) driven by the  
553 35S promoter, respectively. The fusion proteins *OsbZIP86*-FLAG (*bZIP86*-FLAG) and  
554 *OsSAPK10*-GFP (*SAPK10*-GFP) were co-transformed into 3-week old tobacco leaves by  
555 *Agrobacterium* injection. Total protein was extracted 2.5 d after infiltration with extraction buffer (50  
556 mM Tris-HCl, 150 mM NaCl, 2 mM MgCl<sub>2</sub>, 1 mM DTT, 20% glycerol, 1% NP-40, 0.2 mM PMSF,  
557 with complete mini tablet) and then immunoprecipitated with GFP-Trap Agarose (Chromotek, USA)  
558 according to the manufacturer's instructions. The immunoprecipitated proteins were separated via  
559 sodium dodecyl sulfate polyacrylamide gel electrophoresis (SDS-PAGE, 10% gel) and analyzed by  
560 immunoblotting analysis with anti-GFP or anti-FLAG.

561

562 **Statistical analysis**

563 All results were presented as mean ± standard deviation (SD) of three replicates. Statistical

564 analysis was performed using SPSS 19.0, including one-way ANOVA and the least significant  
565 difference. Difference was considered significant at  $p < 0.05$  and highly significant as  $p < 0.01$ .  
566 Diagrams were prepared using GraphPad Prism 8.3.0 and Adobe Photoshop.

567

568 Supplemental Data

569 **Supplemental Table S1.** The description of the predicted 13 target genes of miR2105.

570 **Supplemental Table S2.** Primers used in this study.

571 **Supplemental Figure S1.** Identification of miR2105 and *OsbZIP86* transgenic rice.

572 **Supplemental Figure S2.** *OsbZIP86* is a target gene of miR2105 and the expression pattern analyse of  
573 *OsbZIP86*.

574 **Supplemental Figure S3.** Subcellular localization of *OsbZIP86*.

575 **Supplemental Figure S4.** miR2105 and *OsbZIP86* mediate salt resistance and grain yield of rice under  
576 salt treatment.

577 **Supplemental Figure S5.** Expression changes of ABA biosynthetic and metabolic genes in *OsbZIP86*  
578 overexpression transgenic rice.

579 **Supplemental Figure S6.** *OsbZIP86* binds to promoter fragments of *OsNCED3*, and *OsbZIP86*  
580 interacts with OsSAPKs to regulate *OsNCED3* expression.

581 **Supplemental Figure S7.** Agronomic traits of miR2105 and *OsbZIP86* transgenic rice under normal  
582 conditions.

583

#### 584 **Acknowledgements**

585 We thank Professors Xuncheng Liu (South China Botanical Garden) and Wangjin Lu (South China  
586 Agricultural University) for supporting with the *in vitro* dephosphorylation assays. This research was  
587 supported by National Natural Science Foundation of China (31971816, 31772384, 32171933);  
588 Strategic Priority Research Program of the Chinese Academy of Sciences (XDA24030201-3).

589

#### 590 **Figure legends**

591 **Figure 1.** miR2105 regulates expression of *OsbZIP86* under ABA, drought, and salt treatments.

592 (A–C) Expression changes of *OsbZIP86* and miR2105 under ABA, drought, and salt treatments. RNA  
593 was isolated from 2-week-old ZH11 rice seedlings grown in Yoshida solution supplied with 0.5  $\mu$ M

594 ABA at the indicated time (A). For drought and salt treatments, 2-week-old seedlings grown in Yoshida  
595 solution were exposed to air (B) or treated with 150 mM NaCl (C) for 4 h, and then the seedlings were  
596 transferred to Yoshida solution again for recovery. (D) Expression changes of *OsbZIP86* in transgenic  
597 rice overexpressing osa-miR2105 (miR2105-ox) or with downregulation of osa-miR2105 (STTM2105)  
598 under normal growth conditions. (E) The cleavage site targeted by miR2105 in the *OsbZIP86* mRNA.  
599 The arrow on the miRNA:mRNA alignment indicates the cleavage site from 10 sequencing clones  
600 identified in ZH11 seedlings by 5' -RLM-RACE. *U6* and *e-EF-1a* were used as miRNA and mRNA  
601 reference genes, respectively, and mean  $\pm$  SD (n = 3) values are shown in (A–D). All qRT-PCR analyses  
602 for gene expression were performed in three biological replicates with similar results. (F) Main  
603 stress-related *cis*-acting elements in the 2-kb *OsbZIP86* promoter region. The *cis* elements are  
604 indicated.

605

606 **Figure 2.** miR2105 and *OsbZIP86* mediate drought-resistance and grain yield of rice under drought  
607 condition.

608 (A–B) Phenotypes (A) and survival rates (B) of transgenic rice seedlings under drought treatment.  
609 Two-week-old rice seedlings were grown in boxes with sandy soil, water was poured out, and irrigation  
610 was stopped for 2 weeks until the leaves wilted for 3 d (middle); then, irrigation was resumed for 1  
611 week (bottom), and the seedlings were watered as the control (top). (C) Water loss rate in detached  
612 leaves of the transgenic rice seedlings. Values are means  $\pm$  SD of 30 independent plants. (D–E) Grain  
613 weights per panicle under normal (D) and drought conditions (E). (F–G) Seed setting rate (F) and  
614 thousand grain weight (G) under drought treatment. All plants were grown in boxes filled with sandy  
615 soil. For drought treatment (F–G), all plants were grown under normal conditions until flowering, then  
616 all the water in the boxes was poured out and watering was stopped for 1 week, before plants were  
617 recovered with water for 3 d. Lacunar drought treatment was carried out from flowering to mature  
618 grain. The experiments were performed in three replicates with similar results, and two independent  
619 lines of each transgenic construction were tested. Each repeat was measured in at least 30 seedlings in  
620 (A–B) and in 20 independent plants in (D–G). Values are means  $\pm$  SD; \* $p$  < 0.05, \*\* $p$  < 0.01 according  
621 to student's *t*-test in (B–G). miR2105-ox, miR2105 overexpression; *cribzip86-0403/-1011*,  
622 *OsbZIP86*-CRISPR; *bZIP86*-RNAi, *OsbZIP86* RNAi; STTM2105, miR2105 downregulation;  
623 *bZIP8686-ox*, *OsbZIP86* overexpression.

624

625 **Figure 3.** miR2105 and *OsbZIP86* mediate leaf stomatal opening in rice.

626 (A) Stomatal arrangement in abaxial leaf blade. (B) Area per stomatal pore. (C) SEM images of three  
627 levels of stomatal opening. (D) Statistics of stomatal opening state. Eight-week-old seedling leaves of  
628 ZH11, miR2105, and *OsbZIP86* transgenic rice plants were measured before (ck) and after drought  
629 stress. All images were continuously observed by SEM. Six seedlings of each line were used for  
630 measurement, and 180 stomata per line were measured (B and D). The experiments were performed in  
631 three biological replicates with similar results. Values shown are means  $\pm$  SD of six independent  
632 seedlings. \* $p < 0.05$ , \*\* $p < 0.01$  according to student's *t*-test.

633

634 **Figure 4.** *OsbZIP86* binds to the G-box of *OsNCED3* promoter to regulate its expression.

635 (A) Expression levels of *OsNED3* in miR2105 and *OsbZIP86* transgenic rice under normal conditions  
636 (ck) and drought stress. The rice *e-EF-1a* gene was used as the internal control. Data represent means  $\pm$   
637 SD (n = 3). All qRT-PCR analyses for gene expression were performed in three biological replicates  
638 with similar results. (B) G-box elements (black dot) in 2-kb *OsNCED3* promoter region. P<sub>1</sub>, P<sub>2</sub>, and P<sub>3</sub>  
639 represent probe positions for EMSA and amplification regions for ChIP-qPCR. (C) *In vitro* EMSA  
640 using G-box sequences from promoter of *OsNCED3* as probes. The P<sub>1</sub> probe was a biotin-labelled  
641 fragment of the *OsNCED3* promoter, and the competitor was a non-labelled competitive probe.  
642 GST-tagged *OsbZIP86* was purified, and 2  $\mu$ g protein was used. The gradient indicates the increasing  
643 amount of competitor. GST-86, fusion protein GST-*OsbZIP86*; GST, negative control. (D) *In vivo*  
644 ChIP-qPCR using ZH11 (NoAb, no antibody) and *OsbZIP86*-GFP overexpressing line (bZIP86-GFP).  
645 The anti-GFP antibody was used to precipitate DNA bound to *OsbZIP86*. Precipitated DNA was  
646 amplified with primers overlapping the G-box motif (P<sub>1</sub>, P<sub>2</sub>, and P<sub>3</sub>). For drought and ABA treatment,  
647 ZH11 and *OsbZIP86*-6HA-GFP lines were grown in boxes filled with Yoshida solution for 2 weeks,  
648 then water was poured out or they were treated with 50  $\mu$ m ABA for 2 h. Values are means  $\pm$  SD from  
649 three parallel repeats. NoAb served as a negative control. Rice *Actin* was used as an internal control. (E)  
650 Schematic diagram of various constructs for *in vivo* luciferase transient transcriptional activity assay.  
651 35S: *OsbZIP86*-GFP was constructed as the effector. 35S: *REN-OsNCED3pro*: *LUC* was constructed  
652 as the reporter. Free GFP (empty vector) was used as a negative control. (F–G) *In vivo* luciferase  
653 activity assay in tobacco leaves. D-luciferin was used as the substrate of luciferase. The expression

654 level of *REN* was used as an internal control. The LUC/*REN* ratio represents the relative activity of the  
655 *OsNCED3* promoter. Error bars indicate SD with biological triplicates (n = 3). \**p* < 0.05, \*\**p* < 0.01,  
656 according to student's *t*-test in (D and G).

657

658 **Figure 5.** OsbZIP86 interacts with and functions cooperatively with OsSAPK10 to positively regulate  
659 *OsNCED3* expression.

660 (A) Schematic diagram of various constructs used in the transient transformation assay. Free GFP was  
661 used as a negative control. (B–C) *In vivo* luciferase activity assay in tobacco leaves. D-luciferin was  
662 used as the substrate of luciferase. The expression level of *REN* was used as an internal control. The  
663 LUC/*REN* ratio represents the relative activity of the *OsNCED3* promoter. Error bars indicate SD with  
664 biological triplicates (n = 3). \**p* < 0.05, \*\*\**p* < 0.001 according to student's *t*-test. (D) BiFC analysis of  
665 interaction between OsbZIP86 and OsSAPK10 *in vivo*. CDS of *OsbZIP86* and *OsSAPK10* fused with  
666 the C-terminus and the N-terminus of yellow fluorescent protein (YFP) were co-transformed into rice  
667 protoplasts. Overlaid images show signals for YFP (yellow) and chloroplasts (blue). nYFP alone was  
668 used as a negative control. (E) Pull-down analysis of interaction between OsbZIP86 and OsSAPK10 *in*  
669 *vitro*. MBP-OsSAPK10 was incubated with GST or GST-OsbZIP86 proteins, and the  
670 immunoprecipitated proteins were detected by an anti-GST antibody. Free GST was used as the  
671 negative control. (F) Co-IP analysis of interaction between OsbZIP86 and SAPK10 *in vivo*. GFP,  
672 OsSAPK10-GFP, and OsbZIP86-FLAG were co-expressed in tobacco leaves by *Agrobacterium*  
673 injection. Total protein extracts were immunoprecipitated with the immobilized anti-GFP antibody (Ip),  
674 and the immunoprecipitated protein was then detected by using an anti-FLAG antibody. Input  
675 OsSAPK10-GFP and OsbZIP86-FLAG proteins were detected with anti-GFP and anti-FLAG  
676 antibodies, respectively. The molecular weights (kDa) and proteins are indicated in the left and right  
677 panels, respectively.

678

679 **Figure 6.** miR2105 and *OsbZIP86* mediate leaf ABA biosynthesis of rice under drought conditions.

680 (A) Leaf ABA content of miR2105 and *OsbZIP86* transgenic rice under normal (ck) and drought stress  
681 conditions. Error bars indicate SD for biological triplicates (n = 3). (B) Germination performance of  
682 miR2105 and *OsbZIP86* transgenic rice seedlings under ABA treatment. Seeds were placed on double  
683 sheets of filter paper in a 9-cm Petri dish and moistened with distilled water or 2, 5, or 10  $\mu$ M ABA for

684 7 d. Scale bar, 0.5 cm. (C–D) Lengths of shoots (C) and main roots (D) of miR2105 and *OsbZIP86*  
685 transgenic rice seedlings treated with distilled water or 2  $\mu$ M ABA for 7 d. Experiments were  
686 performed using three biological replicates with similar results. Each repeat was measured in 30  
687 independent seedlings. Values show means  $\pm$  SD of 30 independent plants. \* $p < 0.05$ , \*\* $p < 0.01$   
688 according to student's *t*-test (A, C, and D).

689

690 **Figure 7.** Working model of 'miR2105-*OsbZIP86-OsNCED3*' module functions in regulating drought  
691 resistance

692 Under drought stress, the expression of miR2105 is repressed, whereas the expression of *OsbZIP86* is  
693 induced. Then, *OsbZIP86* is activated by OsSAPK10 through direct interaction, thereby promoting the  
694 expression of *OsNCED3*. The upregulated *OsNCED3* has an important role in regulating ABA  
695 biosynthesis to modulate drought resistance. Arrowheads show positive regulation; flat-ended lines  
696 show negative regulation.

697

698



## Parsed Citations

- Banerjee A, Roychoudhury A. (2017) Abscisic-acid-dependent basic leucine zipper (bZIP) transcription factors in plant abiotic stress. *Protoplasma* 254: 3-16.**  
Google Scholar: [Author Only](#) [Title Only](#) [Author and Title](#)
- Bartel DP. (2004) MicroRNAs: Genomics, biogenesis, mechanism, and function. *Cell* 116: 281-297.**  
Google Scholar: [Author Only](#) [Title Only](#) [Author and Title](#)
- Chae MJ, Lee JS, Nam MH, Cho K, Hong JY, Yi SA, Suh SC, Yoon IS. (2007) A rice dehydration-inducible SNF1-related protein kinase 2 phosphorylates an abscisic acid responsive element-binding factor and associates with ABA signaling. *Plant Molecular Biology* 63: 151-169.**  
Google Scholar: [Author Only](#) [Title Only](#) [Author and Title](#)
- Chen H, Zou Y, Shang Y, Lin H, Wang Y, Cai R, Tang X, Zhou JM. (2008) Firefly luciferase complementation imaging assay for protein-protein interactions in plants. *Plant Physiology* 146: 368-376.**  
Google Scholar: [Author Only](#) [Title Only](#) [Author and Title](#)
- Chen K, Li GJ, Bressan RA, Song CP, Zhu JK, Zhao Y. (2020) Abscisic acid dynamics, signaling, and functions in plants. *Journal of Integrative Plant Biology* 62: 25-54.**  
Google Scholar: [Author Only](#) [Title Only](#) [Author and Title](#)
- Citovsky V, Lee LY, Vyas S, Glick E, Chen MH, Vainstein A, Gafni Y, Gelvin SB, Tzfira T. (2006) Subcellular localization of interacting proteins by bimolecular fluorescence complementation in planta. *Journal of Molecular Biology* 362: 1120-1131.**  
Google Scholar: [Author Only](#) [Title Only](#) [Author and Title](#)
- Dong T, Park Y, Hwang I. (2015) Abscisic acid: biosynthesis, inactivation, homeostasis and signalling. *Plant Hormone Signalling* 58: 29-48.**  
Google Scholar: [Author Only](#) [Title Only](#) [Author and Title](#)
- Finkelstein RR, Gampala S, Rock CD. (2002) Abscisic acid signaling in seeds and seedlings. *Plant Cell* 14: S15-45.**  
Google Scholar: [Author Only](#) [Title Only](#) [Author and Title](#)
- Fu X, Liu C, Li Y, Liao S, Cheng H, Tu Y, Zhu X, Chen K, He Y, Wang G. (2021) The coordination of OsbZIP72 and OsMYBS2 with reverse roles regulates the transcription of OsPsbS1 in rice. *New Phytologist* 229: 370-387.**  
Google Scholar: [Author Only](#) [Title Only](#) [Author and Title](#)
- Fukumoto T, Kano A, Ohtani K, Inoue M, Yoshihara A, Izumori K, Tajima S, Shigematsu Y, Tanaka K, Ohkouchi T, et al. (2013) Phosphorylation of D-allose by hexokinase involved in regulation of OsABF1 expression for growth inhibition in *Oryza sativa* L. *Planta* 237: 1379-1391.**  
Google Scholar: [Author Only](#) [Title Only](#) [Author and Title](#)
- Hellens RP, Allan AC, Friel EN, Bolitho K, Grafton K, Templeton MD, Karunairetnam S, Gleave AP, Laing WA. (2005) Transient expression vectors for functional genomics, quantification of promoter activity and RNA silencing in plants. *Plant Methods* 1: 13.**  
Google Scholar: [Author Only](#) [Title Only](#) [Author and Title](#)
- Huang Y, Guo Y, Liu Y, Zhang F, Wang Z, Wang H, Wang F, Li D, Mao D, Luan S, et al. (2018) 9-cis-epoxycarotenoid dioxygenase 3 regulates plant growth and enhances multi-abiotic stress tolerance in rice. *Frontiers in Plant Science* 9: 162.**  
Google Scholar: [Author Only](#) [Title Only](#) [Author and Title](#)
- Huang Y, Jiao Y, Xie N, Guo Y, Zhang F, Xiang Z, Wang R, Wang F, Gao Q, Tian L, et al. (2019) OsNCED5, a 9-cis-epoxycarotenoid dioxygenase gene, regulates salt and water stress tolerance and leaf senescence in rice. *Plant Science* 287: 110188.**  
Google Scholar: [Author Only](#) [Title Only](#) [Author and Title](#)
- Hwang SG, Lee CY, Tseng CS. (2018) Heterologous expression of rice 9-cis-epoxycarotenoid dioxygenase 4 (OsNCED4) in *Arabidopsis* confers sugar oversensitivity and drought tolerance. *Botanical Studies* 59: 2.**  
Google Scholar: [Author Only](#) [Title Only](#) [Author and Title](#)
- Ito Y, Katsura K, Maruyama K, Taji T, Yamaguchi-Shinozaki K. (2006) Functional analysis of rice DREB1/CBF-type Transcription factors involved in cold-responsive gene expression in transgenic rice. *Plant & Cell Physiology* 47: 141-153.**  
Google Scholar: [Author Only](#) [Title Only](#) [Author and Title](#)
- Joo H, Baek W, Lim CW, Lee SC. (2021) Post-translational modifications of bZIP transcription factors in abscisic acid signaling and drought responses. *Current Genomics* 22: 4-15.**  
Google Scholar: [Author Only](#) [Title Only](#) [Author and Title](#)
- Joo H, Lim CW, Lee SC. (2020) The pepper RING-type E3 ligase, CaATIR1, positively regulates abscisic acid signalling and drought response by modulating the stability of CaATBZ1. *Plant, Cell & Environment* 43: 1911-1924.**  
Google Scholar: [Author Only](#) [Title Only](#) [Author and Title](#)
- Kasuga M, Miura S, Shinozaki K, Yamaguchi-Shinozaki K. (2004) A combination of the *Arabidopsis* DREB1A gene and stress-inducible rd29A promoter improved drought- and low-temperature stress tolerance in tobacco by gene transfer. *Plant & Cell Physiology* 45: 346-350.**

Google Scholar: [Author Only](#) [Title Only](#) [Author and Title](#)

**Kim N, Moon SJ, Min MK, Choi EH, Kim JA, Koh EY, Yoon I, Byun MO, Yoo SD, Kim BG. (2015) Functional characterization and reconstitution of ABA signaling components using transient gene expression in rice protoplasts. *Frontiers in Plant Science* 6: 614.**

Google Scholar: [Author Only](#) [Title Only](#) [Author and Title](#)

**Kobayashi Y, Yamamoto S, Minami H, Kagaya Y, Hattori T. (2004) Differential activation of the rice sucrose nonfermenting1-related protein kinase2 family by hyperosmotic stress and abscisic acid. *Plant Cell* 16: 1163-1177.**

Google Scholar: [Author Only](#) [Title Only](#) [Author and Title](#)

**Koyama T, Sato F, Ohme-Takagi M. (2017) Roles of miR319 and TCP transcription factors in leaf development. *Plant Physiology* 175: 874-885.**

Google Scholar: [Author Only](#) [Title Only](#) [Author and Title](#)

**Kumar A, Sandhu N, Dixit S, Yadav S, Swamy BPM, Shamsudin NAA. (2018) Marker-assisted selection strategy to pyramid two or more QTLs for quantitative trait-grain yield under drought. *Rice* 11: 35.**

Google Scholar: [Author Only](#) [Title Only](#) [Author and Title](#)

**Liu C, Mao B, Ou S, Wang W, Liu L, Wu Y, Chu C, Wang X. (2014) OsbZIP71, a bZIP transcription factor, confers salinity and drought tolerance in rice. *Plant Molecular Biology* 84: 19-36.**

Google Scholar: [Author Only](#) [Title Only](#) [Author and Title](#)

**Liu C, Ou S, Mao B, Tang J, Wang W, Wang H, Cao S, Schlappi MR, Zhao B, Xiao G, et al. (2018) Early selection of bZIP73 facilitated adaptation of japonica rice to cold climates. *Nature Communication* 9: 3302.**

Google Scholar: [Author Only](#) [Title Only](#) [Author and Title](#)

**Liu H, Dong S, Li M, Gu F, Yang G, Guo T, Chen Z, Wang J. (2021) The Class III peroxidase gene OsPrx30, transcriptionally modulated by the AT-hook protein OsATH1, mediates rice bacterial blight-induced ROS accumulation. *Journal of Integrative Plant Biology* 63: 393-408.**

Google Scholar: [Author Only](#) [Title Only](#) [Author and Title](#)

**Ma X, Zhang Q, Zhu Q, Liu W, Chen Y, Qiu R, Wang B, Yang Z, Li H, Lin Y, et al. (2015) A robust CRISPR/Cas9 system for convenient, high-efficiency multiplex genome editing in monocot and dicot plants. *Molecular Plant* 8: 1274-1284.**

Google Scholar: [Author Only](#) [Title Only](#) [Author and Title](#)

**Mao C, Lu S, Lv B, Zhang B, Shen J, He J, Luo L, Xi D, Chen X, Ming F. (2017) A rice NAC transcription factor promotes leaf senescence via ABA biosynthesis. *Plant Physiology* 174: 1747-1763.**

Google Scholar: [Author Only](#) [Title Only](#) [Author and Title](#)

**Miao J, Li X, Li X, Tan W, You A, Wu S, Tao Y, Chen C, Wang J, Zhang D, et al. (2020) OsPP2C09, a negative regulatory factor in abscisic acid signalling, plays an essential role in balancing plant growth and drought tolerance in rice. *New Phytologist* 227: 1417-1433.**

Google Scholar: [Author Only](#) [Title Only](#) [Author and Title](#)

**Min MK, Choi EH, Kim JA, Yoon IS, Han S, Lee Y, Lee S, Kim BG. (2019) Two clade A phosphatase 2Cs expressed in guard cells physically interact with abscisic acid signaling components to induce stomatal closure in rice. *Rice* 12: 37.**

Google Scholar: [Author Only](#) [Title Only](#) [Author and Title](#)

**Mohsenifard E, Ghabooli M, Mehri N, Bakhshi BB. (2017) Regulation of miR159 and miR396 mediated by *Piriformospora indica* confer drought tolerance in rice. *Journal of Plant Molecular Breeding*. 5: 10-18.**

Google Scholar: [Author Only](#) [Title Only](#) [Author and Title](#)

**Nadarajah K, Kumar IS. (2019) Drought response in rice: the miRNA story. *International Journal of Molecular Sciences* 20: 3766.**

Google Scholar: [Author Only](#) [Title Only](#) [Author and Title](#)

**Nambara E, Marion-Poll A. (2005) Abscisic acid biosynthesis and catabolism. *Annual Review of Plant Biology* 56: 165-185.**

Google Scholar: [Author Only](#) [Title Only](#) [Author and Title](#)

**Nantel A, Quatrano RS. (1996) Characterization of three rice basic/leucine zipper factors, including two inhibitors of EmBP-1 DNA binding activity. *Journal of Biological Chemistry* 271: 31296-31305.**

Google Scholar: [Author Only](#) [Title Only](#) [Author and Title](#)

**Nijhawan A, Jain M, Tyagi AK, Khurana JP. (2008) Genomic survey and gene expression analysis of the basic leucine zipper transcription factor family in rice. *Plant Physiology* 146: 333-350.**

Google Scholar: [Author Only](#) [Title Only](#) [Author and Title](#)

**Nonhebel HM, Griffin K. (2020) Production and roles of IAA and ABA during development of superior and inferior rice grains. *Functional Plant Biology* 47: 716-726.**

Google Scholar: [Author Only](#) [Title Only](#) [Author and Title](#)

**Rehman A, Azhar MT, Hinze L, Qayyum A, Li H, Peng Z, Qin G, Jia Y, Pan Z, He S, et al. (2021) Insight into abscisic acid perception and signaling to increase plant tolerance to abiotic stress. *Journal of Plant Interactions* 16: 222-237.**

Google Scholar: [Author Only](#) [Title Only](#) [Author and Title](#)

**Tang N, Zhang H, Li X, Xiao J, Xiong L. (2012) Constitutive activation of transcription factor OsbZIP46 improves drought tolerance in**

rice. *Plant Physiology* 158: 1755-1768.

Google Scholar: [Author Only](#) [Title Only](#) [Author and Title](#)

Wang Y, Hou Y, Qiu J, Wang H, Wang S, Tang L, Tong X, Zhang J. (2020) Abscisic acid promotes jasmonic acid biosynthesis via a 'SAPK10-bZIP72-AOC' pathway to synergistically inhibit seed germination in rice (*Oryza sativa*). *New Phytologist* 228: 1336-1353.

Google Scholar: [Author Only](#) [Title Only](#) [Author and Title](#)

Wang Z, Chen C, Xu Y, Jiang R, Han Y, Chong K. (2004) A practical vector for efficient knockdown of gene expression in rice (*Oryza sativa* L.). *Plant Molecular Biology Reporter* 22: 409-417.

Google Scholar: [Author Only](#) [Title Only](#) [Author and Title](#)

Xia K, Ou X, Tang H, Wang R, Wu P, Jia Y, Wei X, Xu X, Kang SH, Kim SK, et al. (2015a) Rice microRNA osa-miR1848 targets the obtusifolios 14alpha-demethylase gene OsCYP51G3 and mediates the biosynthesis of phytosterols and brassinosteroids during development and in response to stress. *New Phytologist* 208: 790-802.

Google Scholar: [Author Only](#) [Title Only](#) [Author and Title](#)

Xia K, Ou X, Gao C, Tang H, Jia Y, Deng R, Xu X, Zhang M. (2015b) OsWS1 involved in cuticular wax biosynthesis is regulated by osa-miR1848. *Plant, Cell & Environment* 38: 2662-2673.

Google Scholar: [Author Only](#) [Title Only](#) [Author and Title](#)

Xiang Y, Tang N, Du H, Ye HY, Xiong LZ. (2008) Characterization of OsbZIP23 as a key player of the basic leucine zipper transcription factor family for conferring abscisic acid sensitivity and salinity and drought tolerance in rice. *Plant Physiology* 148: 1938-1952.

Google Scholar: [Author Only](#) [Title Only](#) [Author and Title](#)

Xue LJ, Zhang JJ, Xue HW. (2009) Characterization and expression profiles of miRNAs in rice seeds. *Nucleic Acids Research* 37: 916-930.

Google Scholar: [Author Only](#) [Title Only](#) [Author and Title](#)

Yan J, Gu Y, Jia X, Kang W, Pan S, Tang X, Chen X, Tang G. (2012) Effective small RNA destruction by the expression of a short tandem target mimic in *Arabidopsis*. *Plant Cell* 24: 415-427.

Google Scholar: [Author Only](#) [Title Only](#) [Author and Title](#)

Yan J, Zhao CZ, Zhou JP, Yang Y, Wang PC, Zhu XH, Tang GL, Bressan RA, Zhu JK. (2016) The miR165/166 mediated regulatory module plays critical roles in ABA homeostasis and response in *Arabidopsis thaliana*. *PLoS Genetics* 12: e1006416.

Google Scholar: [Author Only](#) [Title Only](#) [Author and Title](#)

Ye N, Zhu G, Liu Y, Li Y, Zhang J. (2011) ABA controls H<sub>2</sub>O<sub>2</sub> accumulation through the induction of OsCATB in rice leaves under water stress. *Plant & Cell Physiology* 52: 689-698.

Google Scholar: [Author Only](#) [Title Only](#) [Author and Title](#)

Yi R, Zhu ZX, Hu JH, Qian Q, Dai JC, Ding Y. (2013) Identification and expression analysis of microRNAs at the grain filling stage in rice (*Oryza sativa* L.) via deep sequencing. *PLoS One* 8: e57863.

Google Scholar: [Author Only](#) [Title Only](#) [Author and Title](#)

Zhang F, Xiang L, Yu Q, Zhang H, Zhang T, Zeng J, Geng C, Li L, Fu X, Shen Q, et al. (2018) ARTEMISININ BIOSYNTHESIS PROMOTING KINASE 1 positively regulates artemisinin biosynthesis through phosphorylating AabZIP1. *Journal of Experimental Botany* 69: 1109-1123.

Google Scholar: [Author Only](#) [Title Only](#) [Author and Title](#)

Zhou L, Liu Y, Liu Z, Kong D, Luo L. (2010) Genome-wide identification and analysis of drought-responsive microRNAs in *Oryza sativa*. *Journal of Experimental Botany* 61: 4157-4168.

Google Scholar: [Author Only](#) [Title Only](#) [Author and Title](#)

Zhu G, Ye N, Zhang J. (2009) Glucose-induced delay of seed germination in rice is mediated by the suppression of ABA catabolism rather than an enhancement of ABA biosynthesis. *Plant Cell Physiology* 50: 644-651.

Google Scholar: [Author Only](#) [Title Only](#) [Author and Title](#)

Zong W, Tang N, Yang J, Peng L, Ma S, Xu Y, Li G, Xiong L. (2016) Feedback Regulation of ABA signaling and biosynthesis by a bZIP transcription factor targets drought-resistance-related genes. *Plant Physiology* 171: 2810-2825.

Google Scholar: [Author Only](#) [Title Only](#) [Author and Title](#)
